# Supplementary material for: New Insights into the Genetic Control of Gene Expression using a Bayesian Multi-tissue Approach
Source: PLOS journal article supplement (doi:10.1371/journal.pcbi.1000737), 2010-04-08
Supplement: S13 (10.1371/journal.pcbi.1000737.s013) [file journal.pcbi.1000737.s013]

**Table S5.** eQTLs that were detected in common to all tissues by the SBR model (FDR <5%). The results from the Bayesian modeling are from the best model visited (see Materials and Methods). For the probe sets, we determined which eQTLs were regulated in *cis* or *trans* by defining *cis*-eQTLs as those with a peak of linkage within 10 Mbp of the physical location of the probe set. We also report the  $R^2$  for the best SBR model visited within each tissue. For comparison with the single tissue SBR model, we report the results from the QTL Reaper, SSM, SBMR and Hotelling's  $T^2$ -test analyses using the same FDR cut-off of 5%, and use "Y" or "N" to indicate whether the shared eQTL was commonly detected or missed, respectively.

| Probe identifier | Gene symbol                 | Gene name                                                           | Transcript chromosome | Transcript physical position (Mb) | Genetic marker at peak of linkage | Marker chromosome | Marker physical position (Mb) | <i>cis/trans</i> | Marker/transcript distance (Mb) | $R^2$ for the best model |        |         |       | SSM (FDR < 5%) | eQTL Reaper (FDR < 5%) | SBMR (FDR < 5%) | Hotelling's $T^2$ test (FDR < 5%) |
|------------------|-----------------------------|---------------------------------------------------------------------|-----------------------|-----------------------------------|-----------------------------------|-------------------|-------------------------------|------------------|---------------------------------|--------------------------|--------|---------|-------|----------------|------------------------|-----------------|-----------------------------------|
|                  |                             |                                                                     |                       |                                   |                                   |                   |                               |                  |                                 | FAT                      | KIDNEY | ADRENAL | HEART |                |                        |                 |                                   |
| 1376249_at       | <i>Fuca2</i>                | plasma alpha-L-fucosidase precursor                                 | 1                     | 8.30                              | <i>D1Ra1327</i>                   | 1                 | 8.21                          | <i>cis</i>       | 0.09                            | 73%                      | 86%    | 88%     | 89%   | Y              | Y                      | Y               | Y                                 |
| 1389650_at       | --                          | --                                                                  | 1                     | 135.87                            | <i>D1Ra142</i>                    | 1                 | 135.50                        | <i>cis</i>       | 0.37                            | 83%                      | 81%    | 63%     | 88%   | Y              | Y                      | Y               | Y                                 |
| 1376780_at       | <i>RGD1310022</i>           | similar to RIKEN cDNA 2610204K14                                    | 1                     | 137.98                            | <i>D1Cebr103s1</i>                | 1                 | 135.50                        | <i>cis</i>       | 2.49                            | 91%                      | 94%    | 74%     | 94%   | N              | N                      | Y               | Y                                 |
| 1370334_at       | <i>Plekhh1</i>              | pleckstrin homology domain containing, family B (evectins) member 1 | 1                     | 158.09                            | <i>D1Ra147</i>                    | 1                 | 158.59                        | <i>cis</i>       | 0.50                            | 54%                      | 57%    | 50%     | 66%   | N              | N                      | N               | Y                                 |
| 1374907_at       | --                          | --                                                                  | 1                     | 158.32                            | <i>D1Ra147</i>                    | 1                 | 158.59                        | <i>cis</i>       | 0.27                            | 90%                      | 88%    | 55%     | 52%   | N              | N                      | Y               | Y                                 |
| 1375664_at       | --                          | --                                                                  | 1                     | 182.05                            | <i>Sonn1g</i>                     | 1                 | 175.73                        | <i>cis</i>       | 6.33                            | 87%                      | 94%    | 96%     | 93%   | Y              | Y                      | Y               | Y                                 |
| 1372846_at       | <i>Cybas3</i>               | cytochrome b, ascorbate dependent 3                                 | 1                     | 213.07                            | <i>D1Ra1293</i>                   | 1                 | 213.04                        | <i>cis</i>       | 0.03                            | 69%                      | 78%    | 96%     | 75%   | Y              | Y                      | Y               | Y                                 |
| 1374960_at       | <i>RGD1564887_predicted</i> | similar to R13011E15Rik protein (predicted)                         | 1                     | 251.07                            | <i>D1Ra181</i>                    | 1                 | 250.38                        | <i>cis</i>       | 0.69                            | 94%                      | 67%    | 65%     | 57%   | Y              | N                      | Y               | Y                                 |
| 1370114_a_at     | <i>LOC497750</i>            | phosphatidylinositol 3-kinase                                       | 2                     | 32.61                             | <i>D2Ra194</i>                    | 2                 | 31.10                         | <i>cis</i>       | 1.50                            | 94%                      | 65%    | 57%     | 64%   | N              | N                      | N               | Y                                 |
| 1371776_at       | <i>Pik3r1</i>               | phosphatidylinositol 3-kinase, regulatory subunit, polypeptide 1    | 2                     | 32.61                             | <i>D2Ra194</i>                    | 2                 | 31.10                         | <i>cis</i>       | 1.51                            | 94%                      | 94%    | 94%     | 92%   | N              | N                      | Y               | Y                                 |
| 1373389_at       | <i>Aca09</i>                | acyl-CoA dehydrogenase 9                                            | 2                     | 122.57                            | <i>D2Mit7</i>                     | 2                 | 114.72                        | <i>cis</i>       | 7.86                            | 82%                      | 73%    | 85%     | 81%   | Y              | Y                      | Y               | N                                 |
| 1374006_at       | <i>Kat3</i>                 | kynurenine aminotransferase III                                     | 2                     | 240.85                            | <i>D2Ra166</i>                    | 2                 | 241.76                        | <i>cis</i>       | 0.91                            | 77%                      | 78%    | 71%     | 89%   | Y              | Y                      | Y               | Y                                 |
| 1388912_at       | <i>Rexo4</i>                | XPMC2 prevents mitotic catastrophe 2 homolog                        | 3                     | 5.85                              | <i>D3Cebr204s4</i>                | 3                 | 5.00                          | <i>cis</i>       | 0.85                            | 90%                      | 92%    | 88%     | 86%   | Y              | Y                      | Y               | Y                                 |
| 1389816_at       | <i>Endog</i>                | endonuclease G                                                      | 3                     | 9.19                              | <i>D3Cebr204s4</i>                | 3                 | 5.00                          | <i>cis</i>       | 4.19                            | 78%                      | 92%    | 60%     | 92%   | Y              | Y                      | Y               | Y                                 |
| 1373537_at       | --                          | --                                                                  | 3                     | 10.09                             | <i>D3Cebr26s1</i>                 | 3                 | 10.21                         | <i>cis</i>       | 0.12                            | 75%                      | 83%    | 53%     | 61%   | N              | N                      | Y               | Y                                 |
| 1375687_at       | <i>Rab14</i>                | Ras-related protein Rab-14                                          | 3                     | 14.24                             | <i>D3Ra153</i>                    | 3                 | 13.01                         | <i>cis</i>       | 1.23                            | 85%                      | 79%    | 81%     | 84%   | Y              | Y                      | Y               | Y                                 |
| 1376796_at       | <i>Rab14</i>                | Ras-related protein Rab-14                                          | 3                     | 14.24                             | <i>D3Ra153</i>                    | 3                 | 13.01                         | <i>cis</i>       | 1.24                            | 79%                      | 71%    | 99%     | 84%   | Y              | N                      | Y               | Y                                 |
| 1385314_at       | <i>Rab14</i>                | Ras-related protein Rab-14                                          | 3                     | 14.24                             | <i>D3Ra153</i>                    | 3                 | 13.01                         | <i>cis</i>       | 1.24                            | 89%                      | 81%    | 91%     | 95%   | Y              | Y                      | Y               | Y                                 |
| 1375676_at       | --                          | --                                                                  | 3                     | 95.34                             | <i>D3Ra166</i>                    | 3                 | 101.26                        | <i>cis</i>       | 5.92                            | 89%                      | 86%    | 88%     | 77%   | Y              | Y                      | Y               | Y                                 |
| 1374921_at       | <i>Rtel1</i>                | Rtel1 protein                                                       | 3                     | 170.50                            | <i>Ecn3</i>                       | 3                 | 166.49                        | <i>cis</i>       | 4.00                            | 95%                      | 91%    | 90%     | 82%   | Y              | Y                      | Y               | Y                                 |
| 1367689_a_at     | <i>Cd36</i>                 | Cd36 antigen                                                        | 4                     | 13.51                             | <i>Cd36</i>                       | 4                 | 13.51                         | <i>cis</i>       | 0.00                            | 76%                      | 81%    | 70%     | 71%   | Y              | Y                      | Y               | Y                                 |
| 1386901_at       | <i>Cd36</i>                 | Cd36 antigen                                                        | 4                     | 13.51                             | <i>Cd36</i>                       | 4                 | 13.51                         | <i>cis</i>       | 0.00                            | 97%                      | 88%    | 93%     | 88%   | Y              | Y                      | Y               | Y                                 |
| 1375724_at       | <i>Glcet1</i>               | glucocorticoid induced transcript 1                                 | 4                     | 33.66                             | <i>D4Utr3</i>                     | 4                 | 34.41                         | <i>cis</i>       | 0.75                            | 76%                      | 63%    | 71%     | 78%   | N              | Y                      | Y               | Y                                 |
| 1370906_at       | <i>Riscat</i>               | all-trans-retinol 13,14-reductase precursor                         | 4                     | 106.10                            | <i>D4Ra135</i>                    | 4                 | 91.58                         | <i>trans</i>     | 14.52                           | 62%                      | 85%    | 84%     | 98%   | Y              | Y                      | Y               | Y                                 |
| 1371996_at       | --                          | --                                                                  | 4                     | 117.56                            | <i>D4Ra149</i>                    | 4                 | 119.52                        | <i>cis</i>       | 1.97                            | 64%                      | 68%    | 74%     | 77%   | Y              | N                      | Y               | Y                                 |
| 1369415_at       | <i>Bhlhb2</i>               | basic helix-loop-helix family, member e40                           | 4                     | 144.14                            | <i>D4Ra1240</i>                   | 4                 | 148.25                        | <i>cis</i>       | 4.11                            | 50%                      | 73%    | 64%     | 73%   | N              | N                      | Y               | Y                                 |
| 1390284_at       | <i>Ccdc77</i>               | coiled-coil domain containing 77                                    | 4                     | 156.71                            | <i>D4Utr4</i>                     | 4                 | 160.25                        | <i>cis</i>       | 3.54                            | 78%                      | 67%    | 74%     | 54%   | N              | N                      | Y               | Y                                 |
| 1373440_at       | --                          | --                                                                  | 5                     | 49.10                             | <i>D5Ra16</i>                     | 5                 | 52.53                         | <i>cis</i>       | 3.44                            | 63%                      | 70%    | 74%     | 65%   | Y              | Y                      | Y               | Y                                 |
| 1374527_at       | <i>Echdc2</i>               | enoyl Coenzyme A hydratase domain containing 2                      | 5                     | 129.28                            | <i>D5Ra179</i>                    | 5                 | 156.50                        | <i>trans</i>     | 27.22                           | 68%                      | 63%    | 69%     | 62%   | N              | N                      | Y               | Y                                 |
| 1371960_at       | --                          | --                                                                  | 5                     | 151.06                            | <i>D5Ra138</i>                    | 5                 | 149.77                        | <i>cis</i>       | 1.30                            | 94%                      | 66%    | 92%     | 96%   | N              | N                      | Y               | Y                                 |
| 1372475_at       | <i>Pink1</i>                | PTEN induced putative kinase 1                                      | 5                     | 157.09                            | <i>D6Mit3</i>                     | 8                 | 45.30                         | <i>trans</i>     | --                              | 85%                      | 91%    | 88%     | 97%   | N              | N                      | N               | N                                 |
| 1392720_at       | --                          | --                                                                  | 7                     | 13.11                             | <i>D7Mit17</i>                    | 7                 | 13.08                         | <i>cis</i>       | 0.04                            | 80%                      | 76%    | 68%     | 61%   | Y              | N                      | Y               | Y                                 |
| 1382778_at       | <i>Dusp6</i>                | dual specificity phosphatase 6                                      | 7                     | 36.90                             | <i>D7Utr1</i>                     | 7                 | 23.79                         | <i>trans</i>     | 13.10                           | 92%                      | 52%    | 54%     | 94%   | N              | N                      | Y               | Y                                 |
| 1384717_at       | <i>Ddef1_predicted</i>      | 130 kDa ARF1 GTPase-activating protein                              | 7                     | 101.49                            | <i>D7Ra177</i>                    | 7                 | 100.29                        | <i>cis</i>       | 1.19                            | 94%                      | 93%    | 88%     | 85%   | Y              | Y                      | Y               | N                                 |
| 1386941_at       | <i>Plec1</i>                | plectin 1                                                           | 7                     | 114.22                            | <i>D7Cebr77s1</i>                 | 7                 | 114.49                        | <i>cis</i>       | 0.27                            | 60%                      | 53%    | 59%     | 55%   | N              | N                      | Y               | Y                                 |
| 1376091_at       | <i>Adsl</i>                 | adenylosuccinate lyase                                              | 7                     | 119.24                            | <i>D7Ra1129</i>                   | 7                 | 119.20                        | <i>cis</i>       | 0.04                            | 52%                      | 63%    | 54%     | 78%   | N              | N                      | Y               | Y                                 |
| 1372805_at       | --                          | --                                                                  | 8                     | 11.15                             | <i>D8Utr3</i>                     | 8                 | 8.94                          | <i>cis</i>       | 2.21                            | 58%                      | 72%    | 73%     | 74%   | Y              | N                      | Y               | Y                                 |
| 1380286_x_at     | <i>RGD1311723</i>           | similar to KIAA1731 protein                                         | 8                     | 12.11                             | <i>D8Utr3</i>                     | 8                 | 8.94                          | <i>cis</i>       | 3.17                            | 82%                      | 87%    | 80%     | 75%   | Y              | Y                      | Y               | Y                                 |
| 1398460_at       | <i>RGD1311723_predicted</i> | similar to KIAA1731 protein (predicted)                             | 8                     | 12.12                             | <i>D8Ra156</i>                    | 8                 | 8.30                          | <i>cis</i>       | 3.82                            | 95%                      | 77%    | 76%     | 72%   | Y              | Y                      | Y               | Y                                 |
| 1377501_at       | <i>Zfp75</i>                | zinc finger protein 75                                              | 8                     | 18.08                             | <i>D8Ra168</i>                    | 8                 | 19.46                         | <i>cis</i>       | 1.38                            | 79%                      | 66%    | 64%     | 72%   | Y              | N                      | Y               | Y                                 |
| 1388366_at       | <i>Mprl4</i>                | mitochondrial ribosomal protein L4                                  | 8                     | 20.03                             | <i>D8Ra168</i>                    | 8                 | 19.46                         | <i>cis</i>       | 0.57                            | 94%                      | 97%    | 96%     | 90%   | Y              | Y                      | Y               | Y                                 |
| 1387366_at       | <i>Ilf3</i>                 | Interleukin enhancer-binding factor 3                               | 8                     | 20.50                             | <i>D8Ra168</i>                    | 8                 | 19.46                         | <i>cis</i>       | 1.03                            | 93%                      | 96%    | 96%     | 97%   | Y              | Y                      | Y               | Y                                 |
| 1374583_at       | <i>Dcps</i>                 | decapping enzyme, scavenger                                         | 8                     | 34.90                             | <i>Es6</i>                        | 8                 | 32.40                         | <i>cis</i>       | 2.50                            | 97%                      | 97%    | 98%     | 98%   | Y              | Y                      | Y               | N                                 |
| 1374485_at       | --                          | --                                                                  | 8                     | 45.98                             | <i>Grik4</i>                      | 8                 | 45.77                         | <i>cis</i>       | 0.21                            | 45%                      | 52%    | 72%     | 48%   | N              | N                      | Y               | Y                                 |
| 1371442_at       | <i>Hyou1</i>                | hypoxia up-regulated protein 1 precursor                            | 8                     | 47.35                             | <i>D8Cebr81s4</i>                 | 8                 | 40.26                         | <i>cis</i>       | 7.09                            | 64%                      | 74%    | 95%     | 90%   | N              | Y                      | Y               | Y                                 |
| 1377452_at       | <i>Clec3b</i>               | C-type lectin domain family 3, member B                             | 8                     | 127.91                            | <i>D8Cebr16s5</i>                 | 8                 | 124.95                        | <i>cis</i>       | 2.96                            | 88%                      | 83%    | 53%     | 83%   | N              | N                      | Y               | Y                                 |
| 1387376_at       | <i>Aox1</i>                 | aldehyde oxidase                                                    | 9                     | 56.73                             | <i>D9Ra193</i>                    | 9                 | 59.61                         | <i>cis</i>       | 2.88                            | 79%                      | 91%    | 60%     | 72%   | Y              | N                      | Y               | Y                                 |
| 1370176_at       | <i>Trak2</i>                | trafficking kinesin-binding protein 2                               | 9                     | 57.48                             | <i>D9Ra119</i>                    | 9                 | 59.61                         | <i>cis</i>       | 2.13                            | 85%                      | 57%    | 74%     | 94%   | N              | N                      | Y               | Y                                 |
| 1374196_at       | <i>Lancl1</i>               | lanC-like protein 1                                                 | 9                     | 65.81                             | <i>Cryga</i>                      | 9                 | 65.28                         | <i>cis</i>       | 0.54                            | 83%                      | 97%    | 71%     | 95%   | Y              | Y                      | Y               | Y                                 |
| 1389334_at       | <i>Ndufa10</i>              | NADH dehydrogenase (ubiquinone) 1 alpha subcomplex 1                | 9                     | 91.66                             | <i>D9Ra15</i>                     | 9                 | 85.37                         | <i>cis</i>       | 6.29                            | 95%                      | 49%    | 51%     | 50%   | N              | N                      | Y               | Y                                 |
| 1370705_at       | <i>Zfp597</i>               | zinc finger protein HIT-4                                           | 10                    | 11.92                             | <i>D10Utr3</i>                    | 10                | 9.09                          | <i>cis</i>       | 2.83                            | 62%                      | 85%    | 96%     | 59%   | Y              | N                      | Y               | Y                                 |
| 1398910_at       | <i>Stub1</i>                | STIP1 homology and U-box containing protein 1                       | 10                    | 15.10                             | <i>D10Mit6</i>                    | 10                | 14.72                         | <i>cis</i>       | 0.38                            | 55%                      | 59%    | 45%     | 65%   | N              | N                      | Y               | Y                                 |
| 1375519_at       | <i>LOC287167</i>            | globin, alpha                                                       | 10                    | 15.56                             | <i>D10Mit6</i>                    | 10                | 14.72                         | <i>cis</i>       | 0.84                            | 88%                      | 51%    | 60%     | 81%   | N              | N                      | Y               | Y                                 |
| 1373417_at       | <i>Piscr3</i>               | phospholipid scramblase 3                                           | 10                    | 56.69                             | <i>D10Wox13</i>                   | 10                | 55.87                         | <i>cis</i>       | 0.82                            | 79%                      | 68%    | 73%     | 63%   | Y              | N                      | Y               | Y                                 |
| 1370930_at       | --                          | --                                                                  | 10                    | 57.62                             | <i>D10Wox13</i>                   | 10                | 55.87                         | <i>cis</i>       | 1.76                            | 78%                      | 79%    | 75%     | 70%   | Y              | Y                      | Y               | Y                                 |
| 1374888_at       | <i>Ccdc49</i>               | coiled-coil domain containing 49 (predicted)                        | 10                    | 86.49                             | <i>D10Ra145</i>                   | 10                | 84.92                         | <i>cis</i>       | 1.57                            | 93%                      | 81%    | 66%     | 80%   | Y              | Y                      | Y               | N                                 |
| 1379896_at       | <i>Ddx42</i>                | ATP-dependent RNA helicase DDX42                                    | 10                    | 95.63                             | <i>D10Utr2</i>                    | 10                | 96.24                         | <i>cis</i>       | 0.62                            | 69%                      | 79%    | 75%     | 66%   | Y              | Y                      | Y               | Y                                 |
| 1389935_at       | <i>RGD1309310_predicted</i> | similar to mKIAA0195 protein                                        | 10                    | 105.90                            | <i>D10Cebr39s1</i>                | 10                | 76.77                         | <i>trans</i>     | 29.13                           | 51%                      | 67%    | 83%     | 81%   | N              | N                      | Y               | Y                                 |
| 1390364_at       | --                          | --                                                                  | 11                    | 32.73                             | <i>D11Mit2</i>                    | 11                | 30.89                         | <i>cis</i>       | 1.84                            | 85%                      | 70%    | 66%     | 75%   | Y              | Y                      | Y               | Y                                 |
| 1372438_at       | <i>Nil2</i>                 | nitrilase family, member 2                                          | 11                    | 44.29                             | <i>D11Ra17</i>                    | 11                | 46.56                         | <i>cis</i>       | 2.26                            | 67%                      | 70%    | 63%     | 93%   | Y              | Y                      | Y               | Y                                 |
| 1376840_at       | --                          | --                                                                  | 12                    | 9.67                              | <i>D12Cebr97s9</i>                | 12                | 5.40                          | <i>cis</i>       | 4.27                            | 75%                      | 93%    | 84%     | 86%   | Y              | Y                      | Y               | Y                                 |
| 1377244_at       | <i>Zfp95</i>                | zinc finger with KRAB and SCAN domains 5                            | 12                    | 9.70                              | <i>D12Cebr97s9</i>                | 12                | 5.40                          | <i>cis</i>       | 4.30                            | 76%                      | 68%    | 47%     | 80%   | N              | N                      | Y               | Y                                 |
| 1376550_at       | --                          | --                                                                  | 12                    | 13.17                             | <i>D12Mit5</i>                    | 12                | 12.80                         | <i>cis</i>       | 0.37                            | 93%                      | 73%    | 61%     | 65%   | Y              | Y                      | Y               | Y                                 |
| 1371905_at       | <i>MGC94190</i>             | similar to 0610007L01Rik protein                                    | 12                    | 27.48                             | <i>D12Mit7</i>                    | 12                | 17.76                         | <i>cis</i>       | 9.72                            | 79%                      | 84%    | 80%     | 72%   | Y              | Y                      | Y               | Y                                 |
| 1373682_at       | <i>DDX51</i>                | DEAD (Asp-Glu-Ala-Asp) box polypeptide 51                           | 12                    | 46.16                             | <i>D12Ra120</i>                   | 12                | 44.12                         | <i>cis</i>       | 2.04                            | 63%                      | 79%    | 58%     | 72%   | Y              | Y                      | Y               | Y                                 |
| 1370815_at       | <i>Nefh</i>                 | Neurofilament heavy polypeptide                                     | 14                    | 85.60                             | <i>D14Utr1</i>                    | 14                | 77.70                         | <i>cis</i>       | 7.89                            | 72%                      | 73%    | 54%     | 73%   | N              | N                      | Y               | Y                                 |
| 1388654_at       | <i>RGD:1309297</i>          | mitochondrial ribosomal protein L52 (predicted)                     | 15                    | 32.49                             | <i>D15Ra16</i>                    | 15                | 32.65                         | <i>cis</i>       | 0.16                            | 97%                      | 92%    | 99%     | 96%   | Y              | Y                      | Y               | Y                                 |
| 1390435_at       | <i>RGD1307583_predicted</i> | LOC361111 (predicted)                                               | 16                    | 6.56                              | <i>D16Mit2</i>                    | 16                | 4.30                          | <i>cis</i>       | 2.25                            | 72%                      | 56%    | 64%     | 72%   | Y              | Y                      | Y               | Y                                 |
| 1376732_at       | <i>Cair3</i>                | calreticulin 3                                                      | 16                    | 17.83                             | <i>D16Utr1</i>                    | 16                | 16.19                         | <i>cis</i>       | 1.63                            | 66%                      | 59%    | 79%     | 89%   | Y              | Y                      | Y               | Y                                 |
| 1388908_at       | <i>Ap1m1</i>                | adaptor-related protein complex 1, mu 1 subunit                     | 16                    | 18.03                             | <i>D16Utr1</i>                    | 16                | 16.19                         | <i>cis</i>       | 1.83                            | 92%                      | 84%    | 92%     | 93%   | Y              | Y                      | Y               | Y                                 |
| 1389793_at       | --                          | --                                                                  | 16                    | 20.00                             | <i>D16Utr1</i>                    | 16                | 16.19                         | <i>cis</i>       | 3.81                            | 89%                      | 77%    | 83%     | 78%   | Y              | Y                      | Y               | Y                                 |
| 1389722_at       | --                          | --                                                                  | 16                    | 62.67                             | <i>D16Ra160</i>                   | 16                | 64.08                         | <i>cis</i>       | 1.41                            | 75%                      | 55%    | 89%     | 62%   | N              | N                      | Y               | Y                                 |
| 1375315_at       | <i>Ai316807</i>             | expressed sequence AI316807                                         | 16                    | 74.19                             | <i>D16Ra134</i>                   | 16                | 72.65                         | <i>cis</i>       | 1.53                            | 62%                      | 70%    | 79%     | 77%   | N              | N                      | Y               | N                                 |
| 1388903_a_at     | <i>Hbid2</i>                | Iron-sulfur cluster assembly 1 homolog, mitochondrial precursor     | 17                    | 10.62                             | <i>D17Uic2</i>                    | 17                | 14.57                         | <i>cis</i>       | 3.75                            | 70%                      | 65%    | 59%     | 85%   | N              | N                      | Y               | N                                 |
| 1383293_at       | <i>Ogn_predicted</i>        | osteo glycin                                                        | 17                    | 20.98                             |                                   |                   |                               |                  |                                 |                          |        |         |       |                |                        |                 |                                   |
